# Supplementary figures and images for: Assessment of maximal handgrip strength: how many attempts are needed?
Source: PubMed Central journal article supplement — J Cachexia Sarcopenia Muscle. 2017 Feb 2;8(3):466–74. doi: 10.1002/jcsm.12181 (PMC5476859; doi:10.1002/jcsm.12181), 2017-02-02

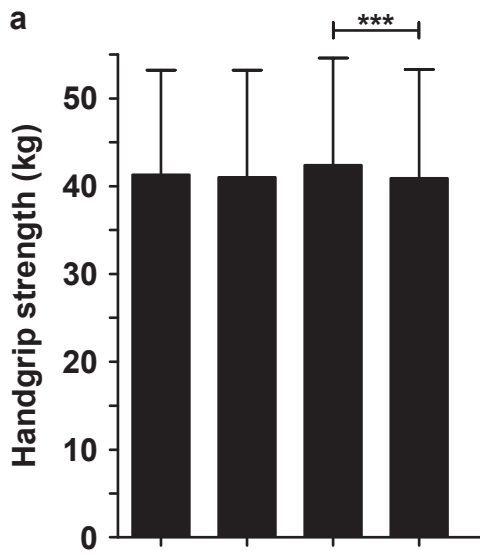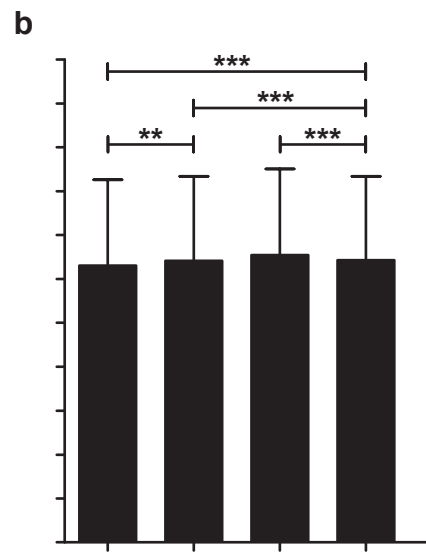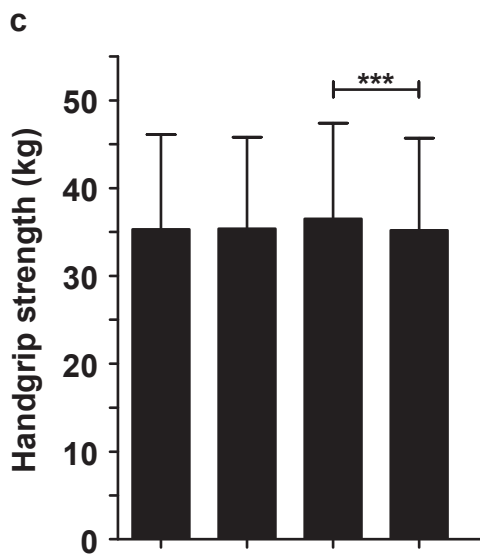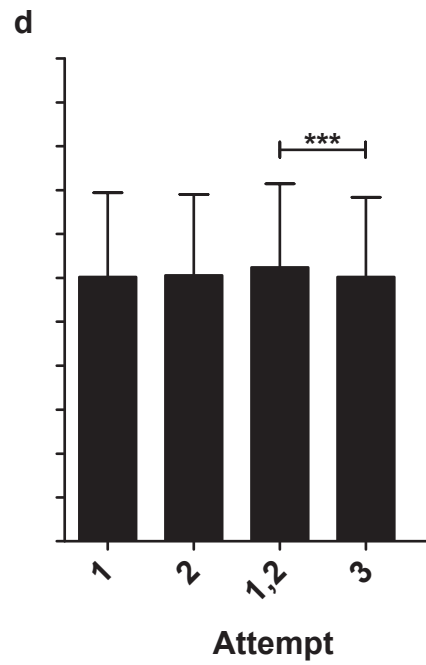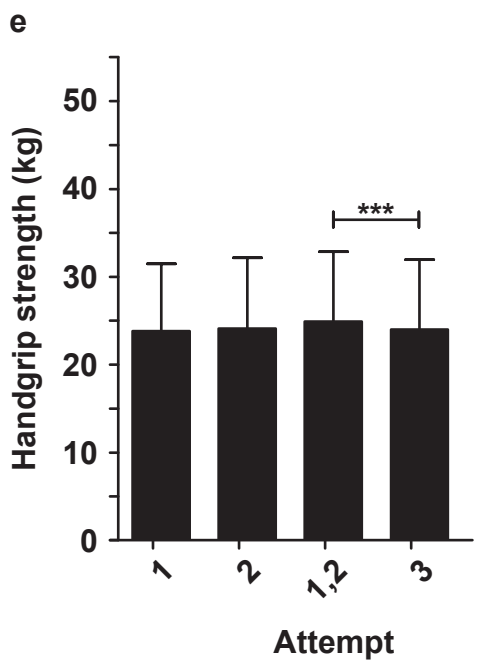

Supplement: JCSM-8-466-s002.pdf [file JCSM-8-466-s002.pdf]

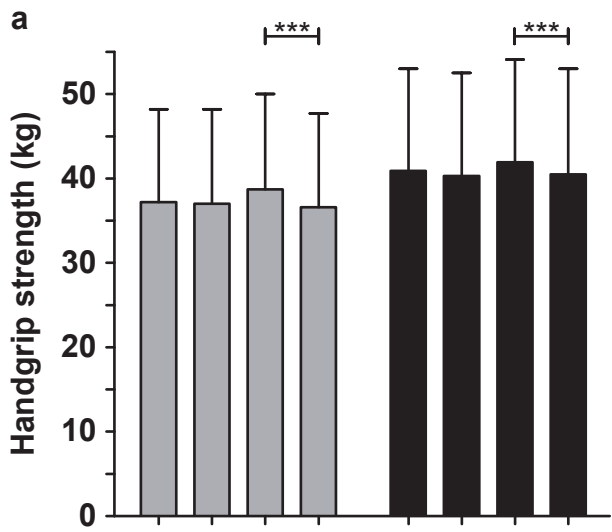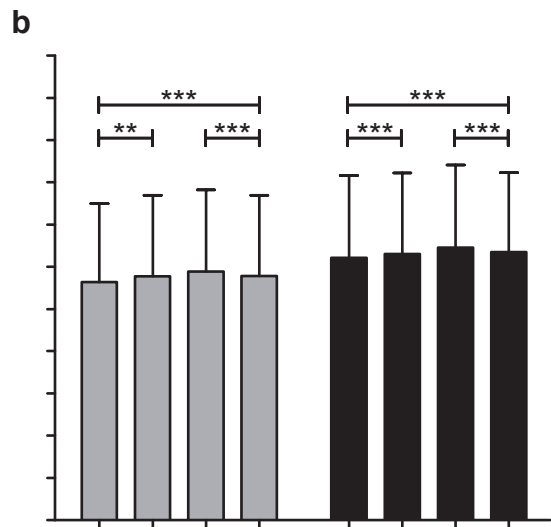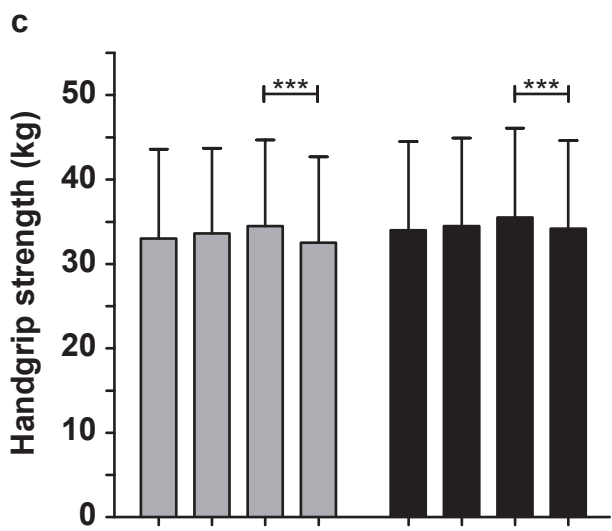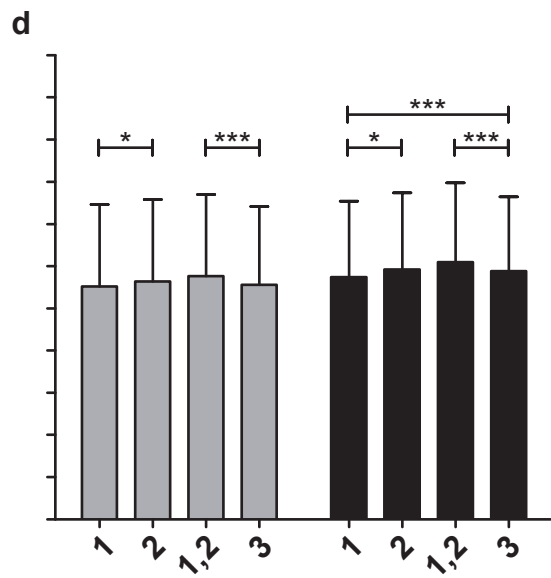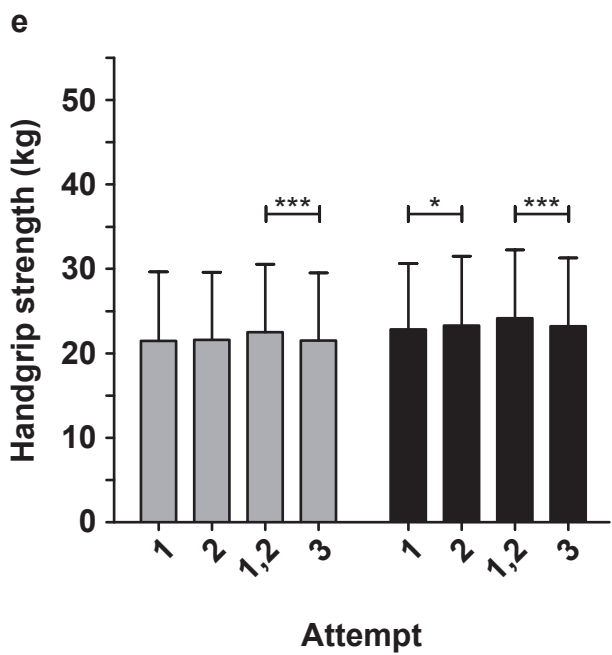

Left hand side

Right hand side

Supplement: JCSM-8-466-s003.pdf [file JCSM-8-466-s003.pdf]

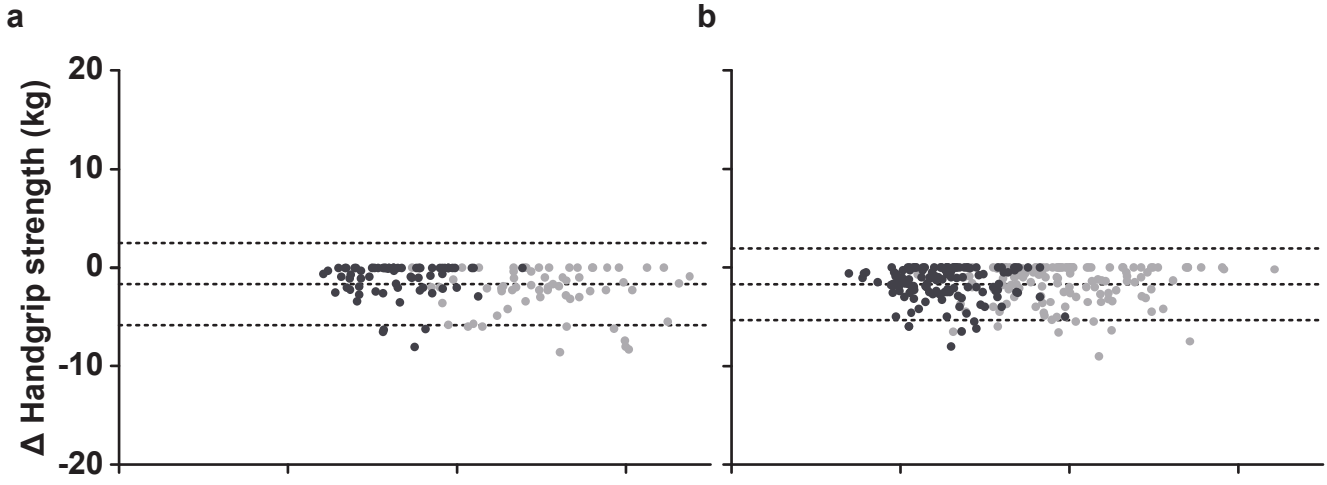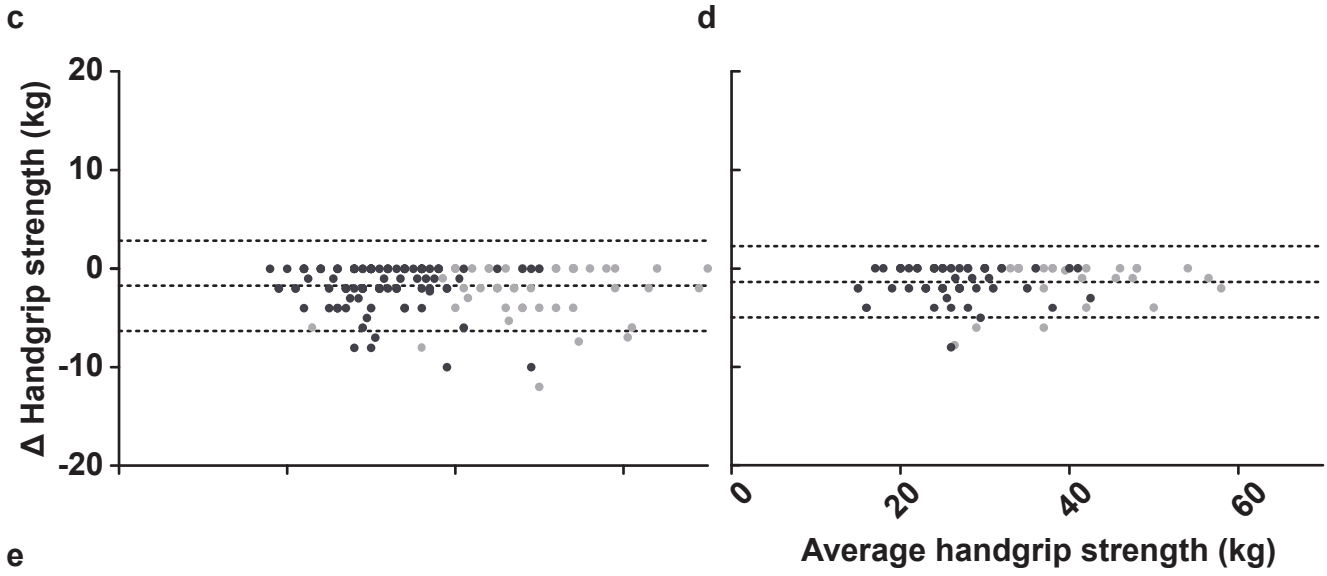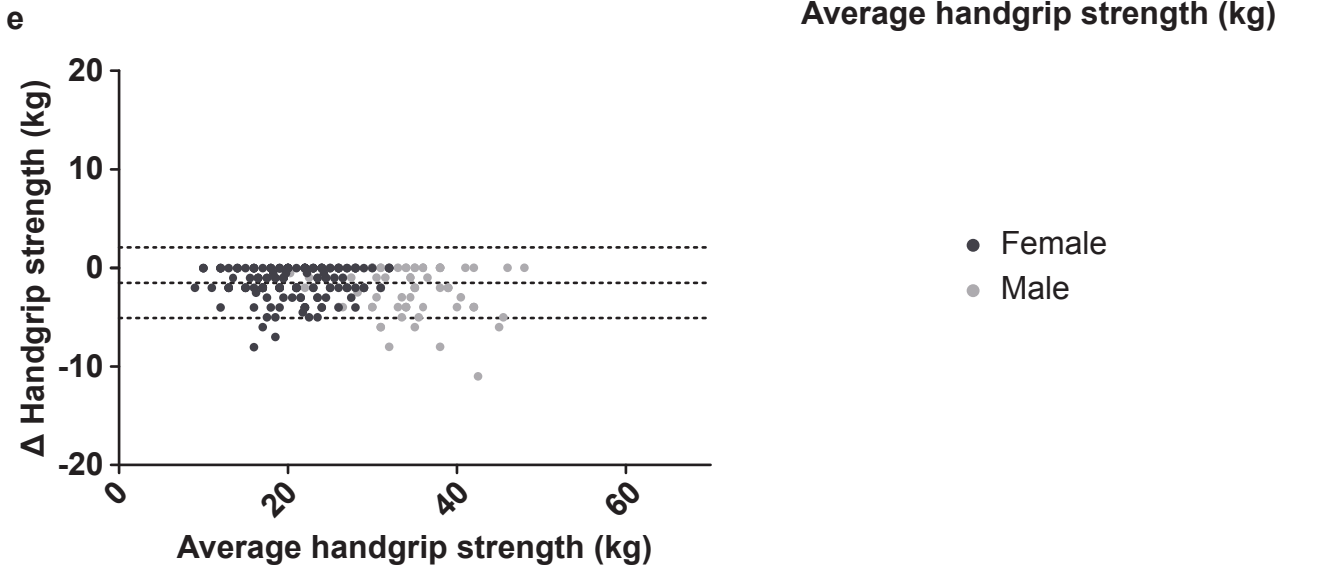

Supplement: JCSM-8-466-s004.pdf [file JCSM-8-466-s004.pdf]
